# Supplementary material for: High Stretch Associated with Mechanical Ventilation Promotes Piezo1-Mediated Migration of Airway Smooth Muscle Cells
Source: MDPI journal article supplement (doi:10.3390/ijms25031748), 2024-02-01
Supplement: s1 [file s1]

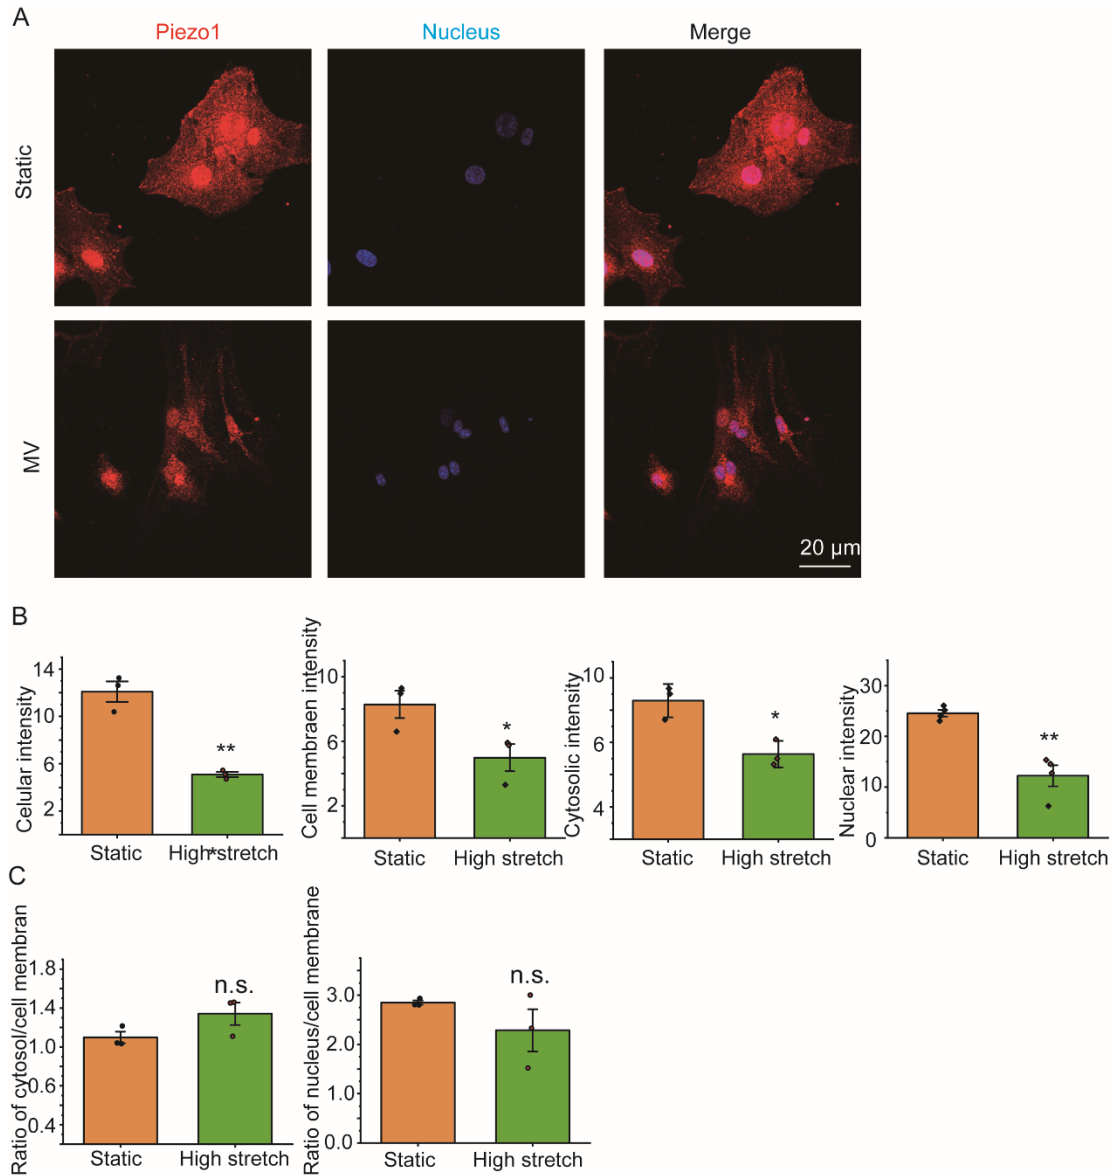

**Figure S1:** Piezo1 distribution in mouse primary airway smooth muscle cells (pASMCs) from spontaneous breathing (Control) or mechanical ventilation (MV). **(A)** Representative images of Piezo1 expression and distribution in primary airway smooth muscle cells (pASMCs) isolated from mice under either Control or MV at high vital volume ( $V_T$ , 18 ml/kg, 3 h), as evaluated with immunofluorescence assay. Bar = 20  $\mu$ M. **(B)** The fluorescence intensity analysis of Piezo1 in pASMCs with ImageJ. **(C)** The ratio of cytosol intensity (left panel) or nucleus intensity (right panel) to cell membrane intensity.  $n = 3$ . \* $P < 0.05$ ; \*\* $P < 0.01$ ; n.s., not significant.

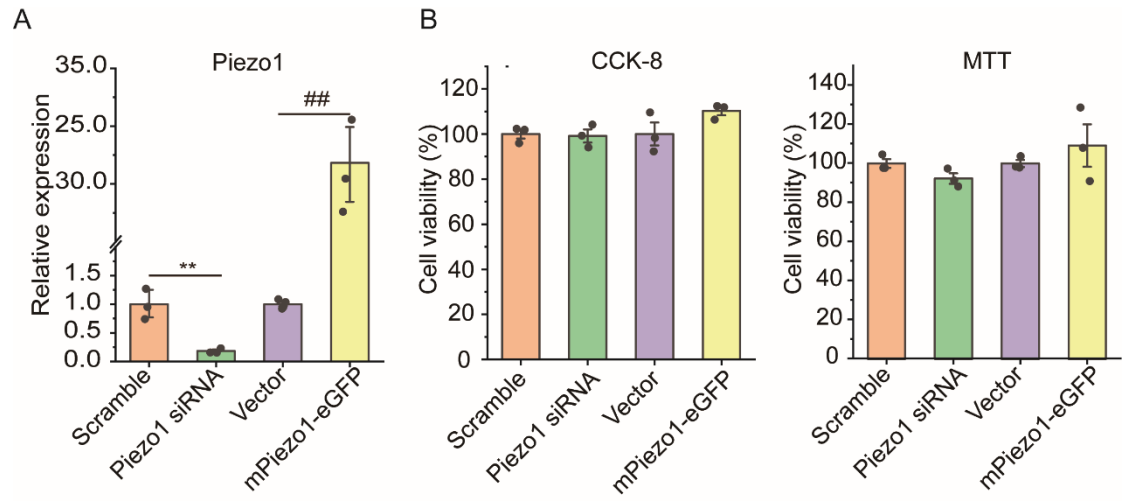

**Figure S2:** Piezo1 mRNA expression quantified by quantitative PCR (qPCR) (A) and cellular activity evaluated by CCK-8 or MTT assay (B) in cell line mouse ASMCs (mASMCs) transfected with either Piezo1 siRNA, mPiezo1-eGFP, Scramble, or Vector.  $n = 3$ . \*\*  $P < 0.05$ ; ##  $P < 0.01$ .

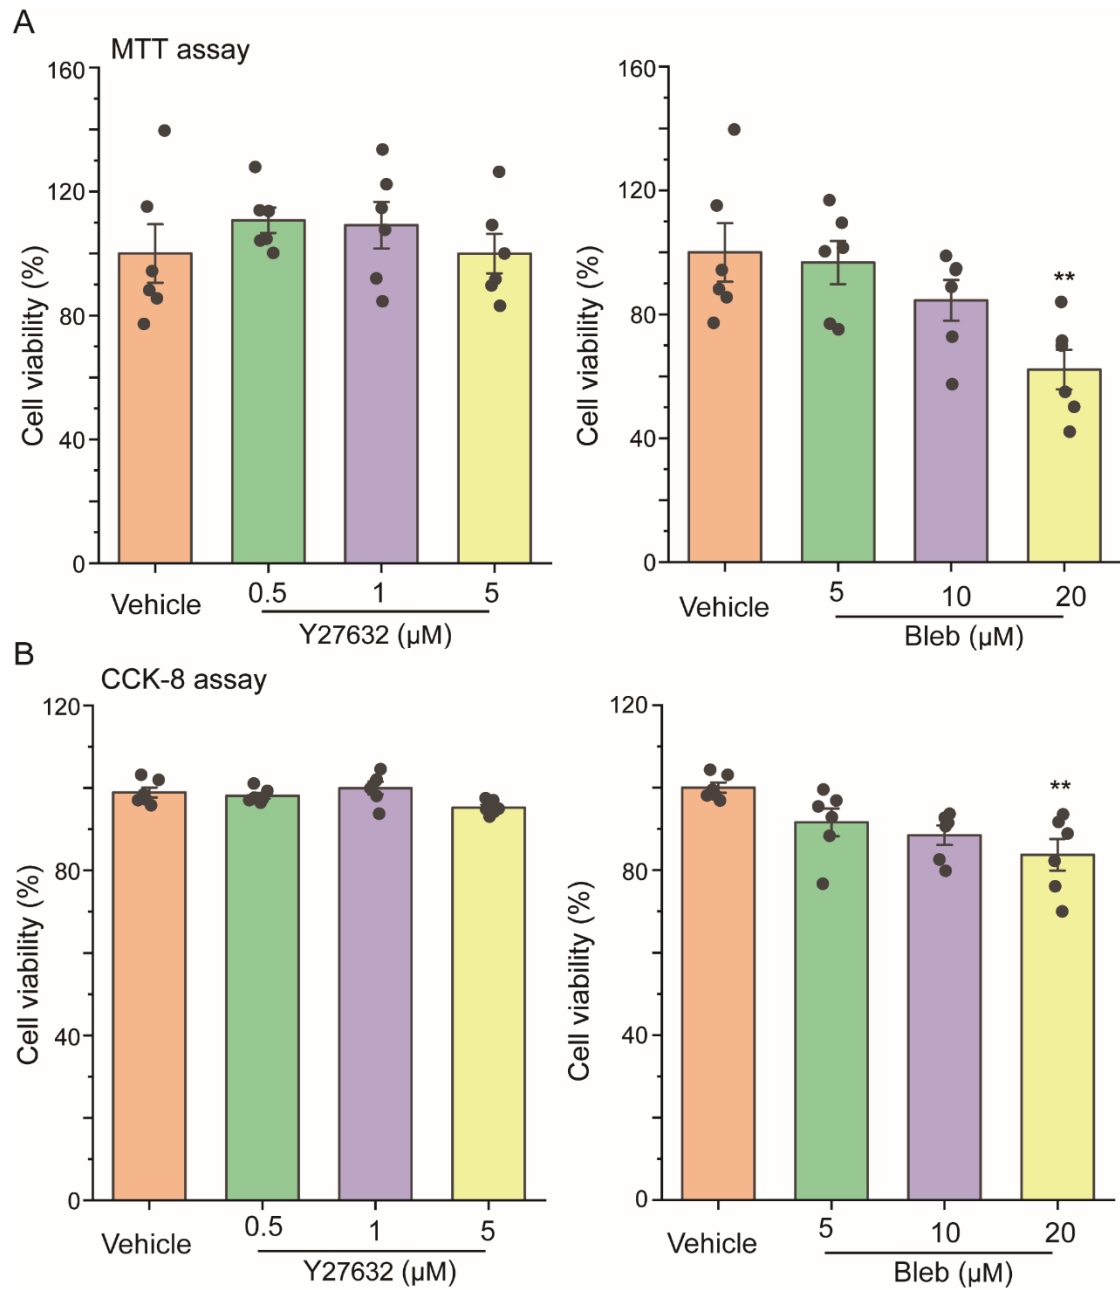

**Figure S3:** The effect of ROCK signaling inhibitor Y27632 (0.5, 1, and 5  $\mu\text{M}$ , dissolved with DMSO) and myosin II inhibitor blebbistatin (Bleb, 5, 10, and 20  $\mu\text{M}$ , dissolved with DMSO) on the cellular activity of mASMCs evaluated with MTT (**A**) and CCK-8 (**B**).  $n = 6$ . \*\*  $P < 0.01$ .

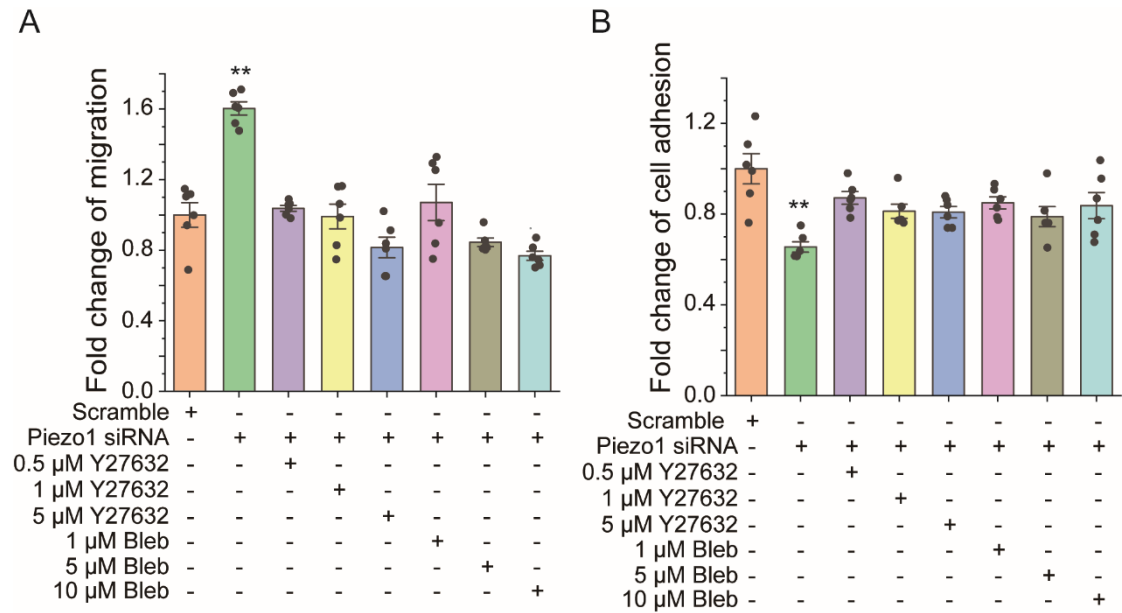

**Figure S4:** The effect of ROCK signaling inhibitor Y27632 (0.5, 1, and 5 μM, dissolved with DMSO) and myosin II inhibitor blebbistatin (Bleb, 1, 5, and 10 μM, dissolved with DMSO) on the loss of Piezo1-enhanced cell migration and -decreased cell adhesion evaluated with transwell assay (A) and cell adhesion assay (B). n = 6. \*\*  $P < 0.01$ .

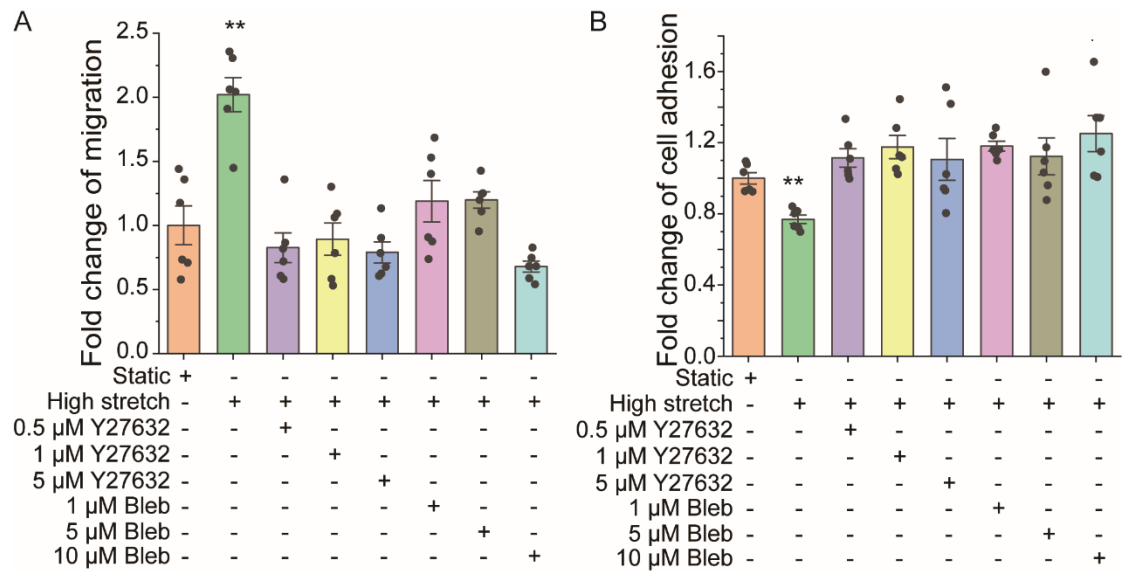

**Figure S5:** The effect of ROCK signaling inhibitor Y27632 (0.5, 1, and 5 μM, dissolved with DMSO) and myosin II inhibitor blebbistatin (Bleb, 1, 5, 10 μM, dissolved with DMSO) on high stretch-enhanced cell migration and -decreased cell adhesion evaluated with transwell assay (A) and cell adhesion assay (B). n = 6. \*\*  $P < 0.01$ .

**Table S1:** Primer sequence of mRNA for mouse airway smooth muscle cells

| No. | Genes                       | Forward primer              | Reverse primer             |
|-----|-----------------------------|-----------------------------|----------------------------|
| 1   | GADPH                       | AGGTCGGTGTGAACGGATT<br>TG   | GGGGTCGTTGATGGCAACA        |
| 2   | Integrin $\alpha$ V         | CGGGTCCCGAGGGAAGTTA         | TGGATGAGCATTACATTTG<br>AGA |
| 3   | Integrin $\beta$ 1          | TGGTCAGCAACGCATATCT<br>GG   | GATCCACAAACCGCAACCT        |
| 4   | Piezo1                      | TCATCATCCTTAACCACATG<br>GTG | TGAAGACGATAGCTGTCAT<br>CCA |
| 7   | Piezo1 siRNA                | CCG<br>GCAUCUACGUCAAUATT    | UAUUUGACGUAGAUGCCG<br>GUG  |
| 8   | Piezo1 scramble<br>controls | UUCUCCGAACGUGUCACG<br>UTT;  | ACGUGACACGUUCGGAGA<br>ATT  |
